# Supplementary material
Source: HighWire-hosted journal article supplement (https://bmjopen.bmj.com/content/6/11/e011250)
Supplement: inline-supplementary-material-4 [file inline-supplementary-material-4.pdf]

#### Appendix 4. Details of hearing threshold levels of included trials

Chen(2013): hearing threshold level differences

|                        | <b>Pre-treatment(dB)</b> | <b>Post-treatment(dB)</b> | <b>Differences(dB)</b> |
|------------------------|--------------------------|---------------------------|------------------------|
| <b>Treatment group</b> | 47.4±6.52                | 25.2±9.94                 | 20.1±8.40              |
| <b>Control group</b>   | 45.8±7.60                | 30.7±10.52                | 14.3±7.13              |

Sato(1988): hearing threshold level differences

|                        | <b>Pre-treatment(dB)</b> | <b>Post-treatment(dB)</b> | <b>Differences(dB)</b> |
|------------------------|--------------------------|---------------------------|------------------------|
| <b>Treatment group</b> | 30.1±6.7                 | 22.9±8.6                  | 7.1±8.9                |
| <b>Control group</b>   | 31.9±8.3                 | 28.1±11.6                 | 3.8±12.0               |

Sun(2005): Elapsed time that the hearing threshold levels reach under the 15 dB

|                     | <b>Treatment group</b> | <b>Control group</b> |
|---------------------|------------------------|----------------------|
| <b>Elapsed time</b> | 12.6±2.3               | 14.3±0.4             |
